# Supplementary material for: Sustainable bioproduction of triterpenoid sapogenins and meroterpenoids in a metabolically engineered medicinal mushroom
Source: Royal Society of Chemistry journal article supplement (doi:10.1039/d4gc06275b), 2025-01-01
Supplement: d4gc06275b1.pdf [file d4gc06275b1.pdf]

Table S1: The plasmids used in this study and their relevant characteristics

| Plasmid                                | Main Characteristics                                                                                                                                | Reference        |
|----------------------------------------|-----------------------------------------------------------------------------------------------------------------------------------------------------|------------------|
| pMD™-18-T                              | E. coli vector, AmpR, ColE1, Lac promoter, LacZ alpha terminator                                                                                    | Commercial stock |
| pGL1                                   | Glyceraldehyde 3 phosphate dehydrogenase (gpd) promoter expressed in pMDTM-18-T vector                                                              | This study       |
| pGL3                                   | Hygromycin resistant gene expressed by promoter gpd in pGL1                                                                                         | This study       |
| pGL3-LUP2                              | Amyrin synthase LUP2(Q8RWT0) from Arabidopsis thaliana expressed by gpd promoter in pGL3                                                            | This study       |
| pGL3-bAS                               | Beta amylin synthase bAS( O82140) from Panax ginseng expressed by gpd promoter in pGL3                                                              | This study       |
| pGL3-CYP716A12                         | Beta amylin monooxygenase CYP716A15(F6H9N6) from Vitis vinifera expressed by gpd promoter in pGL3                                                   | This study       |
| pGL3-LUP2-CYP716A15                    | Amyrin synthase-Beta amylin monooxygenase expressed by gpd promoter in pGL3                                                                         | This study       |
| pGL3- bAS-CYP716A15                    | Beta amylin synthase-Beta amylin monooxygenase expressed by gpd promoter in pGL3                                                                    | This study       |
| pGL3- LUP2-bAS-CYP716A15               | Amyrin synthase-Beta amylin synthase-Beta amylin monooxygenase expressed by gpd promoter in pGL3                                                    | This study       |
| pGL3- LaeA-LUP2-bAS-CYP716A15          | Transcription factor LaeA- Amyrin synthase-Beta amylin synthase-Beta amylin monooxygenase expressed by gpd promoter in pGL3                         | This study       |
| pGL3- VeA-LaeA-LUP2-bAS-CYP716A15      | Velvet protein VeA-Transcription factor LaeA- Amyrin synthase-Beta amylin synthase-Beta amylin monooxygenase expressed by gpd promoter in pGL3      | This study       |
| pGL3- VeA-VelB-LaeA-LUP2-bAS-CYP716A15 | Velvet protein VeA-VelB-Transcription factor LaeA- Amyrin synthase-Beta amylin synthase-Beta amylin monooxygenase expressed by gpd promoter in pGL3 | This study       |
| pGL1-AsCpf1                            | CRISPR-AsCpf1 sequence expressed by gpd promoter in pGL1                                                                                            | This study       |
| pGL1-LS sgRNA                          | CRISPR-AsCpf1 sgRNA sequence expressed by gpd promoter in pGL1                                                                                      | This study       |
| pGL1-LS sgRNA-AsCpf1                   | CRISPR-sgRNA-AsCpf1 sequence expressed by gpd promoter in pGL1                                                                                      | This study       |
| pGL1-Hgr-LS sgRNA-AsCpf1               | Hygromycin resistant gene and CRISPR-LS-sgRNA-AsCpf1 sequence expressed by gpd promoter in pGL1                                                     | This study       |

Table S2: Primers for plasmids construction used in this study

| Primers                                    | Sequence (5'-3')                                            | For plasmid                                |
|--------------------------------------------|-------------------------------------------------------------|--------------------------------------------|
| gpd -F                                     | gtccggcgtagccttaggatcgaCatcgatGtTGTGAGAAAGAGACGAGGTG        | pGL1                                       |
| gpd -R                                     | tatagtcgactcctctttcgtagccGCGGCGTCTAAGTAGCCTCAAAC            | pGL1                                       |
| HgR-F                                      | GTTTGGCCCCCTTCTCACAGGTCAAGcctgaactcaccgcgacgtctg            | pGL3                                       |
| HgR-R                                      | ACAGTCCCCAAACGCACATtctcGGTACCtattcctttgccctcggacg           | pGL3                                       |
| LUP2-F                                     | GTTTGGCCCCCTTCTCACAGGTCAATGGAAACTTAAAATCGGAGAAGGCA          | pGL3-LUP2                                  |
| LUP2-R                                     | GTCCCCAAACGCACATtctcGGTACCCTTATTACAGGTCTGGTGGCGGCAAT        | pGL3-LUP3                                  |
| bAS-F                                      | AtaaccgcagGtaaccgcagTGGAACCTTAAAATTGCCGAGGG                 | pGL3-bAS                                   |
| bAS-R                                      | GCACATtctcGGTACCCTTATTAATTGTTCTCAAGAGGGAGAAGGA              | pGL4-bAS                                   |
| CYP716A15-F                                | CAGGTCAAGtaaccgcagGAACCTAACTTCTACCTTTCTCTGC                 | pGL3-CYP716A15                             |
| CYP716A15-R                                | CAAACGCACATtctcGGTACCCTAAGCTTTGTGGGGGTACAG                  | pGL3-CYP716A15                             |
| LUP2-CYP716A15-F                           | GtaaccgcagGAACCTAACTTCTACCTTTCTCTGCTGCTGCTGTTTGTTA          | pGL3-LUP2-CYP716A15                        |
| LUP2-CYP716A15-R                           | AAGACCTCCCTATTCGTCTGTACCCCCACAAAGCTTAAGGTACCgagaAT          | pGL3-LUP2-CYP716A15                        |
| bAS-CYP716A15-R                            | AtaaccgcagGtaaccgcagTGGAACCTTAAAATTGCCGAGGGTCAAAC           | pGL3- bAS-CYP716A15                        |
| bAS-CYP716A15-R                            | GTCCCCAAACGCACATtctcGGTACCCTTATTAATTGTTCTCAAGAGGGAG         | pGL3- bAS-CYP716A15                        |
| LUP2-bAS-<br>CYP716A15-F                   | CCCTTCTCACAGGTCAATGGAAACTTAAAATCGGAGAAGGCAACGGCGA           | pGL3- LUP2-bAS-<br>CYP716A15               |
| LUP2-bAS-<br>CYP716A15-R                   | CCAGGACCTGTAATAAGGTACCgagaATGTGCGTTTGGGGACTGTTCTGAG         | pGL3- LUP2-bAS-<br>CYP716A15               |
| LaeA-LUP2-bAS-<br>CYP716A15-F              | CTTGGCCCCCTTCTCACAGGTCAAGTCTCGTGTGGATCCCGTCCAATTCA          | pGL3- LaeA-LUP2-bAS-<br>CYP716A15          |
| LaeA-LUP2-bAS-<br>CYP716A15-R              | AGTCCCCAAACGCACATtctcGGTACCCTTATAATGCTTTTCTTCGTGCGT         | pGL3- LaeA-LUP2-bAS-<br>CYP716A15          |
| VeA-LaeA-LUP2-<br>bAS-CYP716A15-F          | AGTCCCCAAACGCACATtctcGGTACCCTTATCCGACAACCTCATAGAGAG         | pGL3- VeA-LaeA-LUP2-<br>bAS-CYP716A15      |
| VeA-LaeA-LUP2-<br>bAS-CYP716A15-R          | TCATCGTTTGGCCCCCTTCTCACAGGTCAAGTTTCTTATCCTCTGCTTTA          | pGL3- VeA-LaeA-LUP2-<br>bAS-CYP716A15      |
| VeA-VelB-LaeA-<br>LUP2-bAS-<br>CYP716A15-F | CAAACGCACATtctcGGTACCCTAATCGTAATCATCACCGTCATCATCAT          | pGL3- VeA-VelB-LaeA-<br>LUP2-bAS-CYP716A15 |
| VeA-VelB-LaeA-<br>LUP2-bAS-<br>CYP716A15-R | GTTTGGCCCCCTTCTCACAGGTCAAATGTATGCTATCGAGGAGCGAGCTC          | pGL3- VeA-VelB-LaeA-<br>LUP2-bAS-CYP716A15 |
| AsCpf1-F                                   | TTTGGCCCCCTTCTCACAGGTCAAGacacagttcgagggtttac                | pGL1-AsCpf1                                |
| AsCpf1-R                                   | GCACATtctcGGTACCtctcagatttactttttctttttgcct                 | pGL1-AsCpf1                                |
| LS sgRNA-F                                 | CCCCCTTCTCACAGGTCAAGtaatttactctttagatAAGGCACGCGCATGCCTCCA   | pGL1-LS sgRNA                              |
| LS sgRNA-R                                 | taatttactctttagatAAGGCACGCGCATGCCTCCAatctgagagGGTACCgagaATG | pGL1-LS sgRNA                              |
| LS sgRNA-AsCpf1-F                          | gtatcaggtgagcaagactgcggtt                                   | pGL1-LS sgRNA-AsCpf1                       |
| LS sgRNA-AsCpf1-R                          | acaaaaggccggcggccacgaaaaggccggcc                            | pGL1-LS sgRNA-AsCpf1                       |
| Hgr-LS sgRNA-<br>AsCpf1-F                  | TTTGGCCCCCTTCTCACAGGTCAAGcctgaactcaccgcgacgtctgctg          | pGL1-Hgr-LS sgRNA-<br>AsCpf1               |
| Hgr-LS sgRNA-<br>AsCpf1-R                  | actcgtccgagggcaaaggaatagGGTACCgagaATGTGCGTTTGGGGA           | pGL1-Hgr- sgRNA-AsCpf1                     |

Table S3: RT-qPCR primers used in this study

| Enzyme         | Type                        | Sequence               | Start | Length | Tm     | GC Percent |
|----------------|-----------------------------|------------------------|-------|--------|--------|------------|
| HMGR           | HMGR-Forward<br>Primer      | GAGGTTTCGTATCAAGAAGG   | 1180  | 22     | 62.103 | 50         |
|                | HMGR-Reverse<br>Primer      | GAGACAAGACTCCGCAATAG   | 1288  | 21     | 61.856 | 52.381     |
| MVK            | MVK-Forward<br>Primer       | CCGTCCCTATGTATGGCTATTC | 527   | 22     | 60.56  | 50         |
|                | MVK-Reverse<br>Primer       | ATTGTCGGAGTATGGTGTGGA  | 863   | 21     | 61.78  | 50         |
| SQS            | SQS-Forward<br>Primer       | CAAGGAAGTGGAGGGTGATTTA | 201   | 22     | 61.968 | 45.455     |
|                | SQS-Reverse<br>Primer       | TGTGGAATTGTCGGAGTATGG  | 331   | 21     | 61.908 | 47.619     |
| SE             | SE-Forward Primer           | GCTATCCCGTCCCTATGTATG  | 1350  | 22     | 61.703 | 50         |
|                | SE-Reverse Primer           | CAGTGAAGAAGTGTGCGAAGA  | 1461  | 21     | 61.665 | 47.619     |
| LS             | LS-Forward<br>Primer        | GCGCTCATGTACGCGAAATA   | 1960  | 20     | 62.866 | 50         |
|                | LS-Reverse<br>Primer        | CTTGTTGAACACGCCCTCTATC | 2082  | 22     | 62.903 | 50         |
| 18S<br>rRNARna | 18S Rrna-Forward<br>Primer  | CCTCGACGAAGTGCCATTTA   | 426   | 20     | 62.06  | 50         |
|                | 18S Rrna-<br>Reverse Primer | GCCAGGGTTTCCCATAGTTTA  | 523   | 21     | 62.039 | 47.619     |

Table S4: Molecular characteristics and origin of major genes used in this study

| Gene/Origin                           | Amino acids (base pairs) | Protein homologue in <i>Ganoderma</i> spp. | Similarity/Identity (%) | Proposed function in the engineered mushroom                                                                                             |
|---------------------------------------|--------------------------|--------------------------------------------|-------------------------|------------------------------------------------------------------------------------------------------------------------------------------|
| LUP2/ <i>Arabidopsis thaliana</i>     | 763(2683)                | <i>G. lucidum</i> LSS                      | 46/52                   | Converts 2,3-oxidosqualene to lupeol, beta-amyrin and alpha-amyrin                                                                       |
| bAS/ <i>Panax ginseng</i>             | 763(2298)                | <i>G. lucidum</i> LSS                      | 53/58                   | Converts 2,3-oxidosqualene into beta-amyrin                                                                                              |
| CYP716A15/ <i>Vitis vinifera</i>      | 480(1443)                | <i>G. leucocontextum</i> Cytochrome P450   | 27/28                   | Catalyzes the carboxylation of beta-amyrin, alpha-amyrin and lupeol to form oleanolic acid ursolic acid and betulinic acid respectively. |
| VeA/ <i>Ganoderma leucocontextum</i>  | 196(588)                 | <i>G. leucocontextum</i> VeA               | 100/100                 | Forms a heterodimer with VeIB and stimulates spore development and fruiting body formation                                               |
| VeIB/ <i>Ganoderma leucocontextum</i> | 531 (1593)               | <i>G. leucocontextum</i> VeIB              | 85.38/85                | Forms a heterodimer with VeA and stimulate the formation of fruiting bodies                                                              |
| LaeA/ <i>Ganoderma lucidum</i>        | 378(1137)                | <i>G. lucidum</i> LaeA                     | 96.83/97                | Regulator secondary metabolism and the development of the mushroom                                                                       |

Table S5: Ganoderic acid profile produced by the GLE029 strain

| Name                 | mz          | HPLC-MS/MS<br>fragments | Actual<br>mass | Retention<br>time (RT) | Formular | Quantification (g/L) |         |
|----------------------|-------------|-------------------------|----------------|------------------------|----------|----------------------|---------|
|                      |             |                         |                |                        |          | pGL3                 | GLE029  |
| Ganoderic acid B*    | 516.691     | 501.11025, 483.1627     | 516.7          | 2.1002                 | C30H44O7 | 0.001                | 0.1212  |
| Ganoderenic acid D   | 535.2648691 | 511.26307, 494.8652     | 512.6          | 2.2355                 | C30H40O7 | 0.004                | 0.1032  |
| Ganoderic acid alpha | 595.2994325 | 497.95117, 480.67152    | 574.7          | 2.5987                 | C32H46O9 | 0                    | 0.07211 |
| Ganoderenic acid B   | 497.2915517 | 513.08641, 495.18923    | 514.6          | 2.8195                 | C30H42O7 | 0                    | 0.03    |
| Ganoderic acid F*    | 612.3203967 | 511.0825, 495.16723     | 570.7          | 3.0615                 | C32H42O9 | 0                    | 0.005   |
| Ganoderic acid I*    | 553.2723296 | 515.6728, 495.16723     | 532.7          | 3.5889                 | C30H44O8 | 0.07                 | 0.208   |
| Lucidenic acid E2    | 499.2700904 | 480.7825                | 516.6          | 3.8167                 | C29H40O8 | 0.008                | 0.1036  |
| Lucidenic acid K     | 493.2140903 | 475.2711                | 472.6          | 3.8738                 | C27H36O7 | 0                    | 0.06    |
| Lucidenic acid L     | 509.223562  | 501.83623               | 474.6          | 3.9595                 | C27H38O7 | 0                    | 0.01    |
| Lucidenic acid J*    | 1025.513618 | 513.17298, 452.8923     | 490.6          | 4.0023                 | C27H38O8 | 0.04                 | 0.05    |
| Lucidenic acid E*    | 1031.517413 | 516.17263, 485.16728    | 515.6          | 4.3444                 | C29H40O8 | 0.01                 | 0.04    |
| Ganoderic acid G*    | 1082.594045 | 531.02671, 513.02671    | 532.7          | 4.9426                 | C30H44O8 | 0                    | 0.06    |
| Ganoderic acid theta | 553.276101  | 551.26712, 497.51728    | 530.6          | 5.3417                 | C30H42O8 | 0                    | 0.007   |
| Ganoderiol D         | 453.3361445 | 411.36728, 267.81627    | 488.7          | 5.89725                | C30H48O5 | 0.006                | 0.005   |
| Ganoderic acid A*    | 516.309     | 515.36722, 497.10836    | 516.7          | 7.25                   | C30H44O7 | 0.008                | 0.06    |
| Lanosterin*          | 427.3890524 | 427.67318               | 426.7          | 8.6332                 | C30H50O  | 0.03                 | 0.06    |

\*Means compound verified with the authentic standard

Table S6: Quantification of the meroterpenoids produced by the GLE029 strain

| Name            | mz        | HPLC-MS/MS mz fragments | Actual mass | Retention time (RT) | Formular | Quantification (g/L) |        |
|-----------------|-----------|-------------------------|-------------|---------------------|----------|----------------------|--------|
|                 |           |                         |             |                     |          | pGL3                 | GLE029 |
| 10'-Hydroxy-GHQ | 261.1496  | 290.11136, 291.12360    | 262.34      | 12.093              | C16H22O3 | 0                    | 1.57   |
| (+)-chizhine A  | 289.10809 | 265.14789               | 290.31      | 7.785               | C16O18O5 | 0                    | 2.36   |
| (+)-chizhine C  | 305.10275 | 306.10617, 307.10818    | 306.31      | 6.486               | C16H18O6 | 0.38                 | 6.79   |

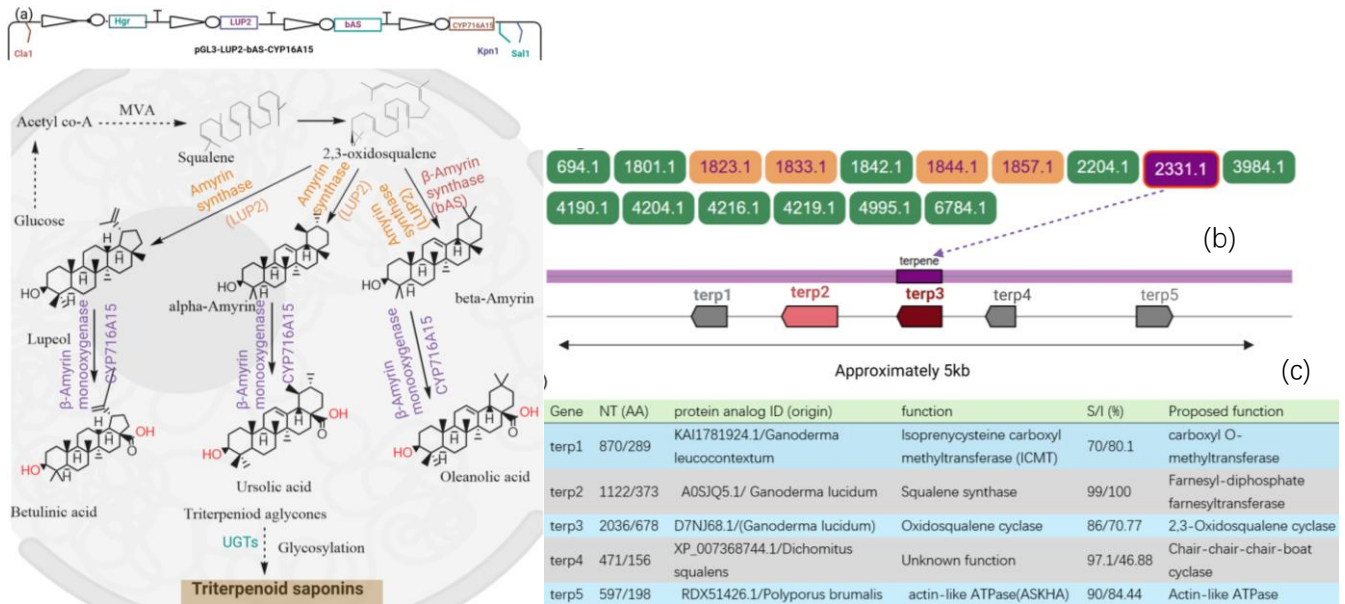

Fig. S1: (a) The illustrative metabolic map of the co-expressed -LUP2- bAS -CYP716A15 pathway. (b) The biosynthetic gene clusters in the mushroom mycelium. The clusters in green colour are the 11 nonribosomal peptide synthases (NRPS); the clusters in brown colour are the 4 polyketide synthases (PKS), and the purple cluster is the terpene gene clusters. (c) The reconstructed terpene gene cluster in the mushroom.

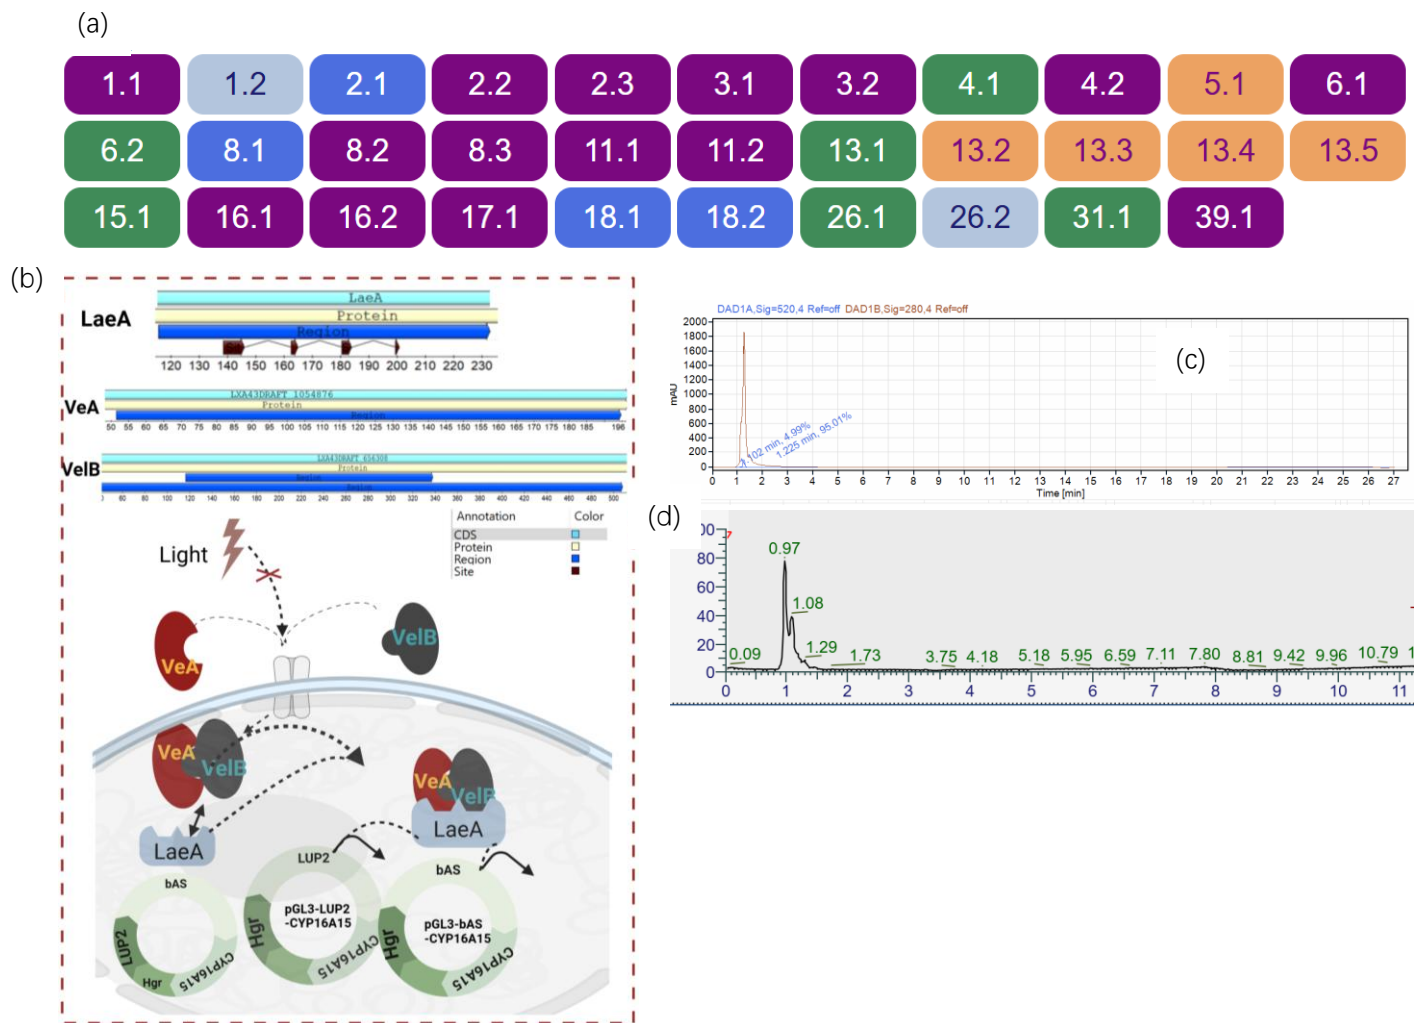

Fig. S2: The biosynthetic gene clusters from the sequenced genome of the fruitlet of the mushroom. The clusters in green colour are the six (6) nonribosomal peptide synthetases (NRPS); the clusters in brown colour are the five (5) polyketide synthetases (PKS), and the purple cluster is the fifteen (15) terpene gene clusters; the blue colours are the four (4) RiPP, and the light blue are the two (2) hybrid gene clusters. (b) The UGENE-based structural analysis of the VeA – VeB- LaeA proteins and their proposed reaction mechanism. (c-d) The HPLC and LC-MS/MS of the meroterpenoids.



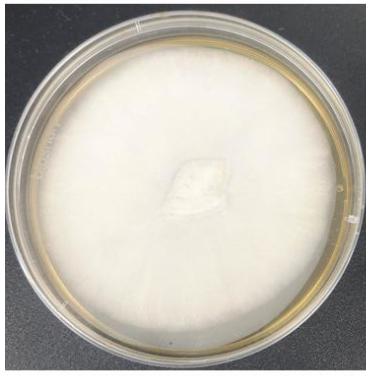

pGL3 strain (control)

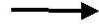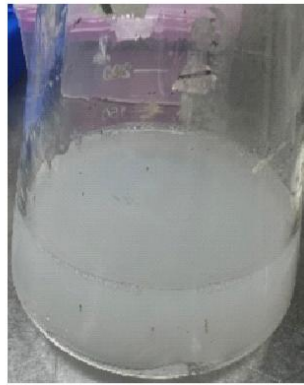

SSG medium

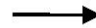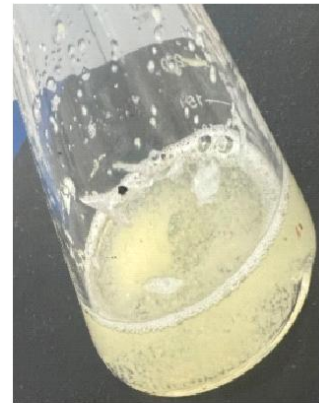

After 15 days fermentation at 30 degree and 200 rpm

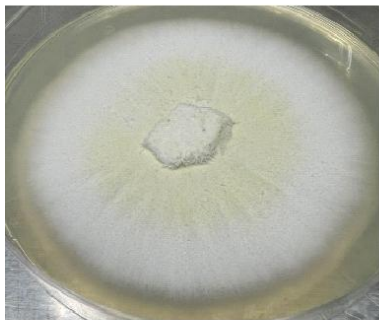

GLE029 strain

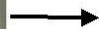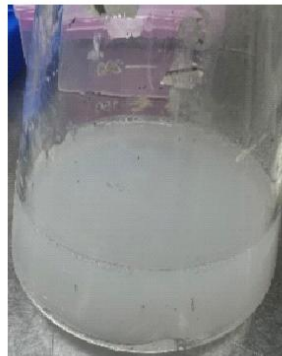

SSG medium

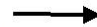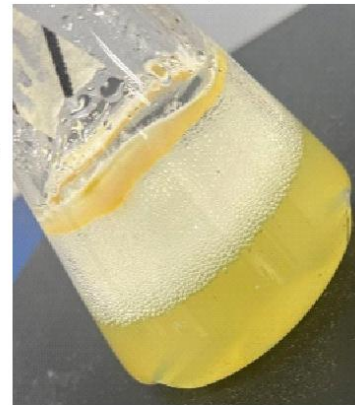

After 15 days fermentation at 30 degree and 200 rpm

Fig. S3: The morphological appearance of the GLE029 and pGL3 strain (control) and its fermentation products

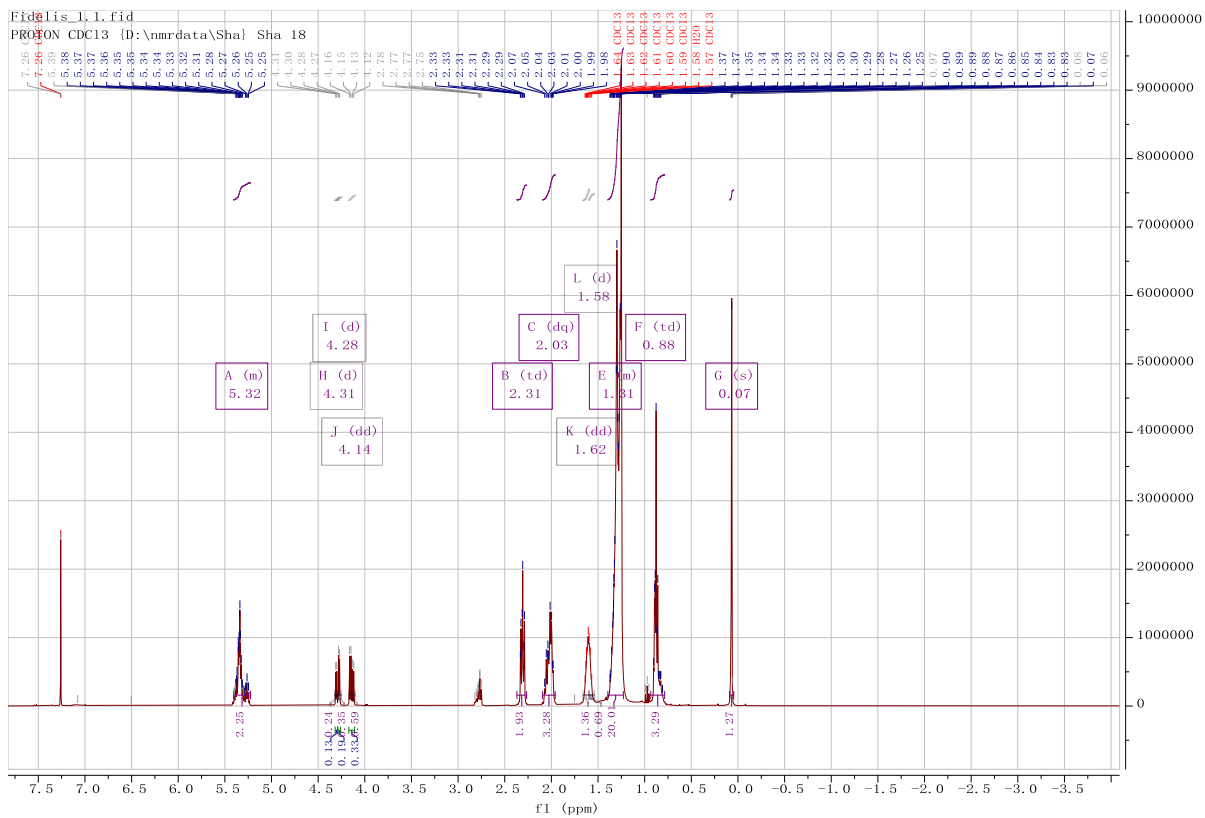

Fig. S4: The  $^1\text{H}$  NMR Spectrum of (1) ( $^1\text{H}$  NMR (400 MHz,  $\text{CDCl}_3$ ))

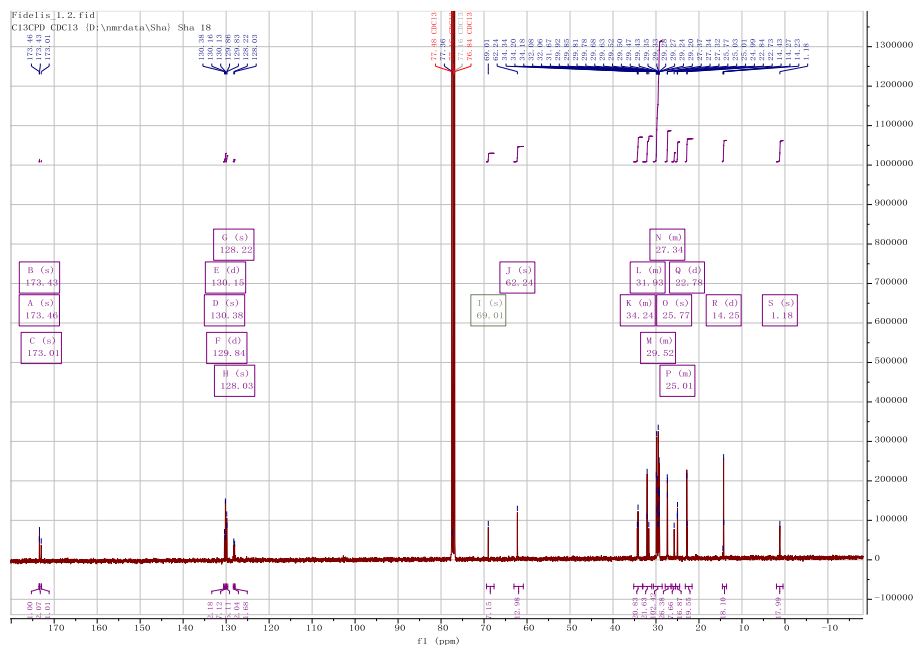

Fig.S5: The  $^{13}\text{C}$  NMR spectrum of (1). ( $^{13}\text{C}$  NMR (101 MHz,  $\text{CDCl}_3$ ))

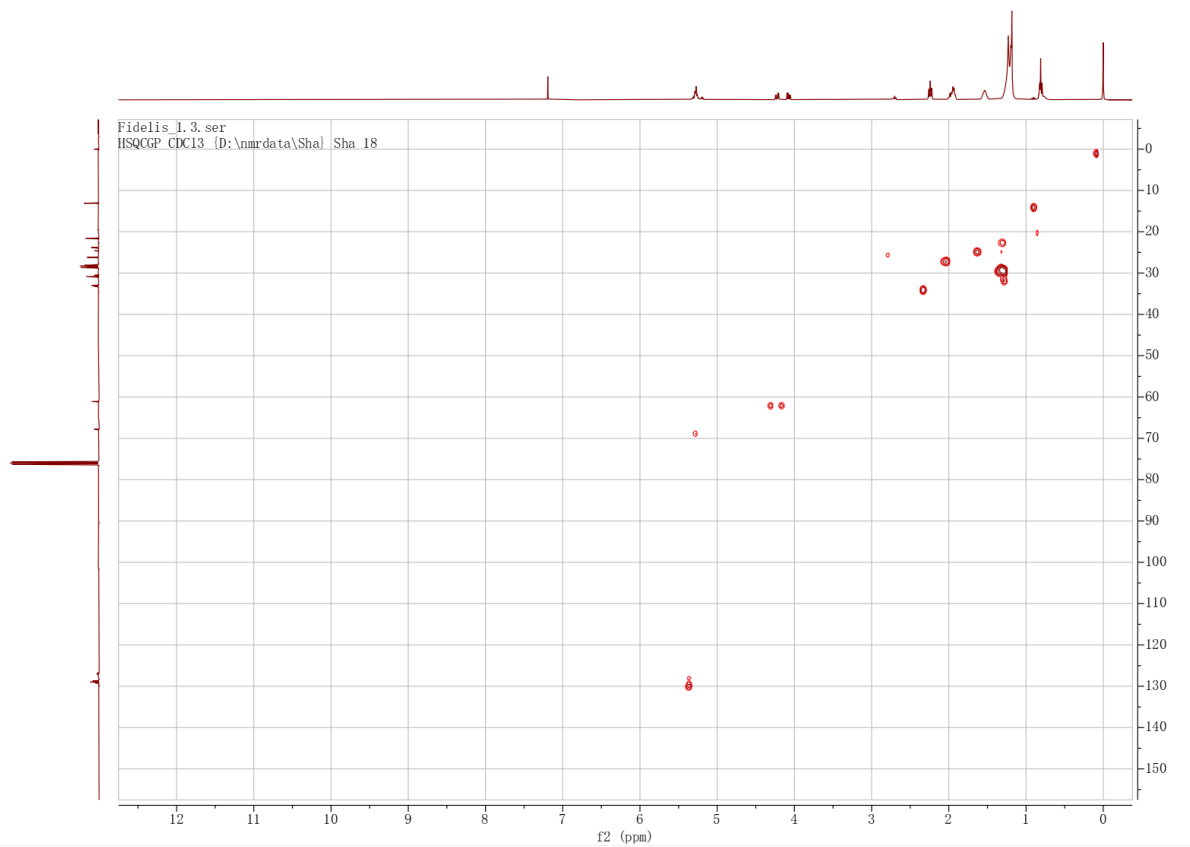

Fig. S6: The DEPT spectrum of **(1)**

## Supplementary Methodology

### LC-MS/MS CONDITIONS

The LC-MS/MS was run in both ESI positive and ESI negative ion modes. An Accucore™ C18 HPLC column (2.6µm, 2.1x150mm) was used for both positive and negative ESI modes. The mobile phase consisted of 0.1% formic acid in water ( phase A) and methanol (phase B), and separation was achieved using the following gradient: 0min 5% B; 0.5 min, 5%B; 13min, 95%B; 16.9min 95%B; 17min, 5%B; 20min, 5%B. The flow rate was 0.3mL/min, and the column temperature was 45 °C. The injection volume was 1 µL. The mass range was from m/z 100 to 1,000. The resolution was 70,000 for the full MS scans and 17,500 for HCD MS/MS scans. The Collision energy was set at 20, 50, 80eV. The mass spectrometer operated as follows: spray voltage, 3,800 V (+) and 3,200 V (-); sheath gas flow rate, 40 arbitrary units; auxiliary gas flow rate, 8 arbitrary units; capillary temperature, 320°C; Probe Heater Temperature, 350°C; S-lens RF level, 50.
